1 **Mechano-regulation of bone adaptation is controlled by the**  
2 **local *in vivo* environment and logarithmically dependent on**  
3 **loading frequency**

4

5 Ariane C. Scheuren<sup>1</sup>, Paul Vallaster<sup>1</sup>, Gisela A. Kuhn<sup>1</sup>, Graeme R. Paul<sup>1</sup>, Angad Malhotra<sup>1</sup>,  
6 Yoshitaka Kameo<sup>1,2</sup>, Ralph Müller<sup>1\*</sup>

7 <sup>1</sup> Institute for Biomechanics, ETH Zurich, Zurich, Switzerland

8 <sup>2</sup> Institute for Frontier Life and Medical Sciences Kyoto University, Kyoto, Japan

9

10

11 \*Corresponding author

12 Prof. Ralph Müller, PhD

13 ram@ethz.ch

14

## 15 **Abstract**

16 It is well established that cyclic, but not static, mechanical loading has anabolic effects on bone.  
17 However, the function describing the relationship between the loading frequency and the  
18 amount of bone adaptation remains unclear. Using a combined experimental and computational  
19 approach, this study aimed to investigate whether bone mechano-regulation is controlled by  
20 mechanical signals in the local *in vivo* environment and dependent on loading frequency.  
21 Specifically, by combining *in vivo* micro-computed tomography (micro-CT) imaging with  
22 micro-finite element (micro-FE) analysis, we monitored the changes in microstructural as well  
23 as the mechanical *in vivo* environment (strain energy density (SED) and SED gradient) of  
24 mouse caudal vertebrae over 4 weeks of either cyclic loading at varying frequencies of 2Hz,  
25 5Hz, or 10Hz, respectively or static loading. Higher values of SED and SED gradient on the  
26 local tissue level led to an increased probability of bone formation and a decreased probability  
27 of bone resorption. In all loading groups, the SED gradient was superior in the determination  
28 of local bone formation and resorption events as compared to SED. Cyclic loading induced  
29 positive net remodeling rates when compared to sham and static loading, mainly due to an  
30 increase in mineralizing surface and a decrease in eroded surface. Consequently, bone volume  
31 fraction increased over time in 2Hz, 5Hz and 10Hz (+15%, +21% and +24%,  $p < 0.0001$ ), while  
32 static loading led to a decrease in bone volume fraction (-9%,  $p \leq 0.001$ ). Furthermore, regression  
33 analysis revealed a logarithmic relationship between loading frequency and the net change in  
34 bone volume fraction over the four week observation period ( $R^2 = 0.74$ ). In conclusion, these  
35 results suggest that bone adaptation is regulated by mechanical signals in the local *in vivo*  
36 environment and furthermore, that mechano-regulation is logarithmically dependent on loading  
37 frequency with frequencies below a certain threshold having catabolic effects, and those above  
38 anabolic effects. This study thereby provides valuable insights towards a better understanding

39 of the mechanical signals influencing bone formation and resorption in the local *in vivo*  
40 environment.

41 **Keywords:**

42 Bone adaptation, mechanical loading, *in vivo* micro-CT imaging, frequency dependency

## 43 **Introduction**

44 It is well established that cyclic, but not static loading has anabolic effects on bone [1-4]. This  
45 clear-cut discrepancy in osteogenic responses to both loading patterns highlights the key role  
46 of loading frequency in mechano-regulation of bone remodeling - the coordinated process by  
47 which bone is continuously formed and resorbed. Yet, the exact relationship between loading  
48 frequency and bone remodeling and bone adaptation remains unclear. While both experimental  
49 [5-7] and theoretical studies [8, 9] have suggested a dose-response relationship such that bone  
50 formation increases with higher loading frequencies, Warden and Turner have shown this  
51 relationship to be non-linear [10] using an axial loading model of mouse ulnae. Using this  
52 model, they showed that cortical bone adaptation increased with frequencies up to 5 and 10Hz,  
53 but then plateaued thereafter. In line with these results, more recent *in silico* studies have found  
54 non-linear relationships between loading frequency and bone adaptation both in cortical [11] as  
55 well as in trabecular [12] bone. In the latter study, a single trabecula was subjected to cyclic  
56 uniaxial loading at frequencies of either 1Hz, 3Hz, 5Hz, 10Hz or 20Hz. Similar to the study by  
57 Warden et al., bone volume fraction increased up to 10Hz but then plateaued thereafter [12].  
58 However, owing to the lack of *in vivo* studies investigating the effects of loading frequency on  
59 trabecular bone adaptation, the validity of such *in silico* studies remains unclear. Furthermore,  
60 as frequency effects have been shown to vary depending on the anatomical region investigated  
61 [13], the optimal frequency must be identified for every specific loading model.

62 Using a tail-loading model, we have previously shown that cyclic loading at a frequency of  
63 10Hz over four weeks elicits anabolic responses in mouse caudal vertebrae [14]. Furthermore,  
64 by combining time-lapsed micro-computed tomography (micro-CT) imaging with micro-finite  
65 element (micro-FE) analysis, we were able to demonstrate that bone remodeling in the  
66 trabecular compartment is controlled by local mechanical signals at the tissue level [15-17].

67 Specifically, by registering consecutive time-lapsed *in vivo* micro-CT images onto one another  
68 [18], sites of bone formation and resorption were quantified in three dimensions and  
69 subsequently linked to corresponding mechanical signals calculated in the local *in vivo*  
70 environment (LivE) [15-17]. Herein, simulating the distribution of strain energy density (SED)  
71 - defined as the increase in energy associated with the tissue deformation per unit volume (i.e.,  
72 a measure of direct cell strain) - within the caudal vertebrae revealed that bone formation was  
73 more likely to occur at sites of high SED, whereas bone resorption was more likely to occur at  
74 sites of low SED [15, 17]. While SED is widely used as a mathematical term to describe the  
75 mechanical signal influencing bone remodeling [15, 19-21], other mechanical signals, such as  
76 interstitial fluid flow through the lacuna-canalicular network (LCN), are also known to play a  
77 major role in determining the local mechanical environment surrounding osteocytes, the main  
78 mechanosensors in bone [22-24]. In this respect, it has been suggested that measures of fluid  
79 flow, such as the gradient in SED, would allow improved predictions of adaptive bone  
80 remodeling events [16, 25]. In this study, we therefore aimed to 1) investigate the effects of  
81 varying loading frequencies on the mechano-regulation of trabecular bone in mouse caudal  
82 vertebrae, 2) assess whether adaptive bone remodeling can be linked to mechanical signals in  
83 the local *in vivo* environment and 3) compare the modeling performance of SED and the  
84 gradient in SED for the prediction of local bone formation and resorption events on the tissue  
85 level. Specifically, we used time-lapsed *in vivo* micro-CT imaging to monitor bone adaptation  
86 over time in individual animals in response to cyclic loading at frequencies of 2Hz, 5Hz and  
87 10Hz as well as in response to static loading. In comparison to conventional two-dimensional  
88 (2D) histomorphometric techniques, which have previously been used to investigate effects of  
89 varying frequencies on bone adaptation [1, 4, 7, 13], the ability to quantify not only bone  
90 formation but also resorption over time could elucidate contrasting effects observed after static

91 and cyclic loading. Furthermore, the analysis of various mechanical signals in the local *in vivo*  
92 environment by means of micro-FE analysis provided a better understanding of these signals  
93 influencing bone forming and resorbing cells on the local level. Finally, by determining the  
94 conditional probabilities for bone formation and resorption events to occur as a function of these  
95 mechanical signals [15], this study contributed towards the description of the relationship  
96 between local mechanical signals and the subsequent mechano-regulation of bone adaptation.  
97 In future, these results will be highly beneficial for *in silico* studies aiming to predict the  
98 mechano-regulation of bone adaptation in response to various interventions.

## 99 **Results**

### 100 **Bone adaptation to load is dependent on loading frequency**

101 In order to investigate the effects of varying loading frequencies on bone adaptation, we used  
102 an *in vivo* micro-CT approach [26] to monitor bone adaptation of the sixth caudal vertebrae of  
103 C57BL/6J mice subjected to a 4-week loading regime of either sham (0N), 8N static or 8N  
104 cyclic loading with frequencies of 2Hz, 5Hz, or 10Hz, respectively. Table 1 shows the  
105 difference between the first and last time point (i.e., bone parameter<sub>week4-week0</sub>) of the bone  
106 structural parameters in the trabecular and cortical bone. In the trabecular bone compartment,  
107 the difference of bone volume fraction (BV/TV) and trabecular thickness (Tb.Th) between the  
108 first and last time point was significantly different between groups ( $p < 0.0001$ ), whereas no  
109 significant differences were detected between groups for the trabecular number and separation  
110 (Tb.N and Tb.Sp,  $p > 0.05$ ). Whereas the sham and static loading groups showed a net decrease  
111 in BV/TV and Tb.Th, the cyclic loading groups at 2Hz, 5Hz and 10Hz displayed increases in  
112 BV/TV and Tb.Th, with all of them being significantly different to the sham group (Table 1).  
113 With respect to the structural parameters of cortical bone, differences between the first and last  
114 time point were significantly different between groups for cortical area fraction (Ct.Ar/Tt.Ar,

115  $p < 0.0001$ ) and cortical thickness (Ct.Th,  $p < 0.01$ ), where the cyclic loading groups showed  
116 significantly greater increases compared to the sham-loaded group (Table 1).

117

118 **Table 1. Difference between week 0 and week 4 for bone structural parameters in the**  
 119 **trabecular and cortical compartments.** P-values denote a significant difference between  
 120 groups determined by one-way ANOVA, while “\*\*” denotes significant difference to sham as  
 121 assessed by multiple comparisons Dunnett’s test (\* p<0.05, \*\* p<0.01, \*\*\* p<0.001 and \*\*\*\*  
 122 p<0.0001).

| Morphometric parameter | sham        | static       | 2Hz             | 5Hz             | 10Hz            | p-value |
|------------------------|-------------|--------------|-----------------|-----------------|-----------------|---------|
| <b>BV/TV (%)</b>       | -0.93±0.789 | -1.408±1.392 | 2.333±1.315**** | 3.240±1.692**** | 3.680±1.084**** | <0.0001 |
| <b>Tb.Th (mm)</b>      | 0.006±0.005 | 0.006±0.005  | 0.021±0.01***   | 0.020±0.007**   | 0.021±0.006***  | <0.0001 |
| <b>Tb.N (1/mm)</b>     | 0.263±0.122 | -0.286±0.076 | -0.234±0.127    | -0.341±0.082    | -0.295±0.221    | >0.05   |
| <b>Tb.Sp (mm)</b>      | 0.034±0.019 | 0.037±0.009  | 0.031±0.024     | 0.043±0.013     | 0.034±0.027     | >0.05   |
| <b>Ct.Ar/Tt.Ar (%)</b> | 0.507±1.187 | 0.524±1.931  | 2.746±0.950*    | 3.838±2.209**   | 3.496±1.733**   | <0.0001 |
| <b>Ct.Th (mm)</b>      | 0.004±0.005 | 0.005±0.005  | 0.013±0.005*    | 0.014±0.013*    | 0.014±0.009*    | <0.01   |

123

124 Figure 1 shows the relative changes in trabecular bone morphometric parameters over the 4-  
 125 week loading period for the different loading groups. BV/TV developed differently over time  
 126 between the loading groups (interaction effect, p<0.0001). Compared to the sham-loaded group,  
 127 which showed no change in BV/TV over time (-6%, p>0.05), cyclic loading at all frequencies  
 128 (2Hz, 5Hz and 10Hz) led to a dose-response increase in BV/TV with higher frequencies  
 129 resulting in higher increases in BV/TV (Fig 1A). Herein, the 5Hz and 10Hz groups showed a  
 130 significant increase compared to baseline already 2 weeks after the start of loading (p≤0.001  
 131 and p<0.0001), while the 2Hz group showed a significant increase relative to baseline only after  
 132 three weeks (p≤0.001). At the end of the 4-week loading regime, these groups showed a 15%,  
 133 21% and 24% higher BV/TV relative to baseline (p<0.0001 for 2Hz, 5Hz and 10Hz). Static  
 134 loading on the other hand, had catabolic effects resulting in significantly lower BV/TV (-9%,  
 135 p≤0.01) at the last time point relative to baseline. In line with the changes in BV/TV, Tb.Th  
 136 developed differently over time between the loading groups (interaction effect, p<0.0001, Fig  
 137 1B). By the end of the 4-week loading intervention, all cyclic loading groups showed significant



138 increases in Tb.Th ( $p < 0.0001$ ), which was not observed in the static and sham-loaded groups  
139 ( $p > 0.05$ ). Although the number of trabeculae (Tb.N) decreased and trabecular separation  
140 increased (Tb.Sp) over time (Fig 1C,D,  $p < 0.001$ ), no relative differences were observed  
141 between the groups ( $p > 0.05$ ). These results thus suggest that increases in BV/TV due to cyclic  
142 loading were mainly driven by thickening of the trabeculae rather than by the inhibition of the  
143 reduction in the number of trabeculae.

144 By plotting the relative changes in BV/TV as a function of loading frequency, regression  
145 analysis revealed a logarithmic relationship between bone adaptation and loading frequency as  
146 a best fit to the data ( $R^2 = 0.74$ , Fig 1F) with loading frequencies above  $0.36\text{Hz} \pm 0.08$  having  
147 anabolic effects, and frequencies below this threshold having catabolic effects. Although there  
148 were no significant differences between the cyclic loading groups, loading at 10Hz had the  
149 earliest and largest anabolic effects compared to the other frequencies.

150

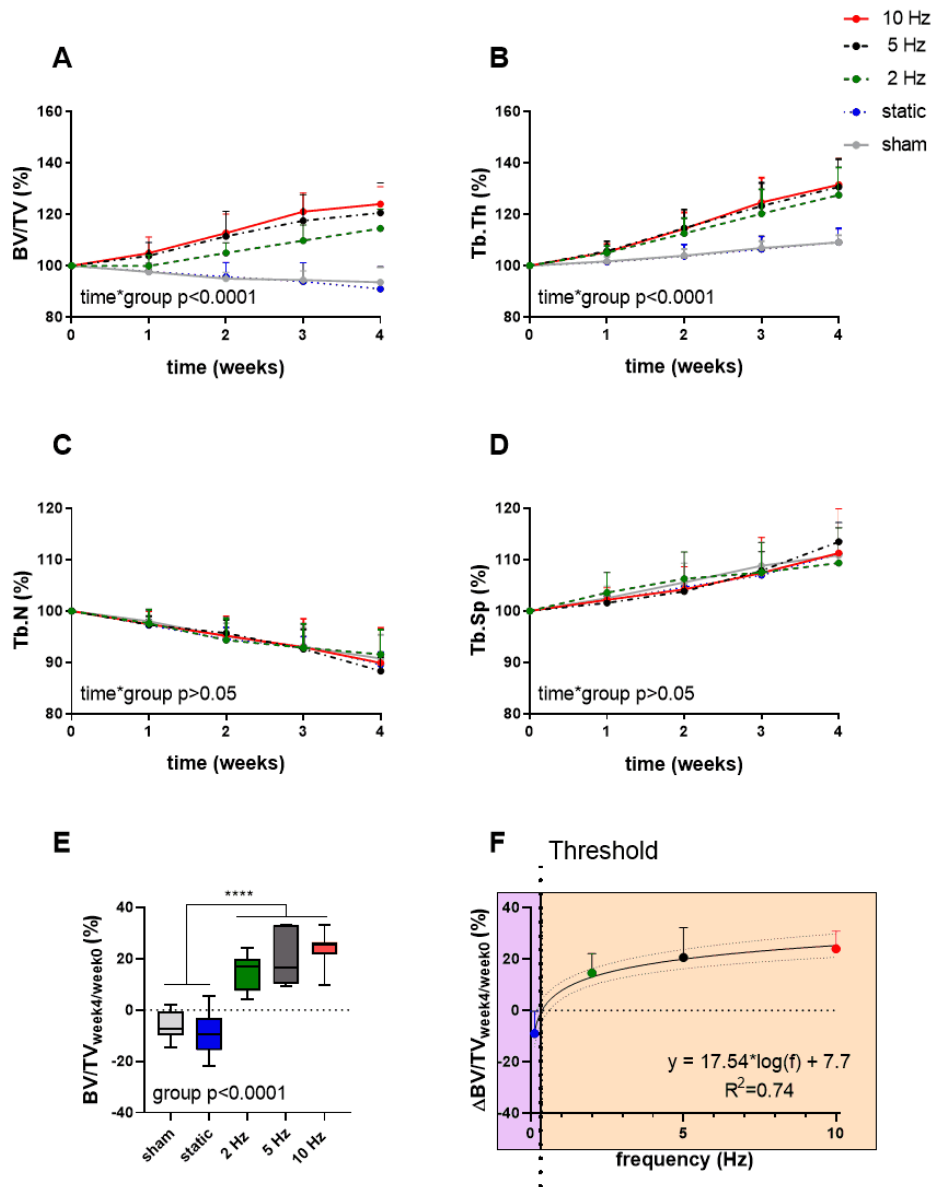

151

152 **Fig 1. Relative changes of structural bone morphometric parameters in the trabecular**  
 153 **compartment over the 4-week loading period as assessed by *in vivo* micro-CT.** (A) Bone  
 154 volume fraction (BV/TV), (B) trabecular thickness (Tb.Th), (C) trabecular number (Tb.N) and  
 155 (D) trabecular spacing (Tb.Sp). (Data represent mean±standard deviation (SD) for n=5-8/group,  
 156 p-values for interaction effect between group and time are shown as determined by linear mixed  
 157 effects model). (E) The relative change from week 4 relative to baseline (BV/TV<sub>week4/week0</sub>) (F)  
 158 was fitted with a logarithmic regression line. (Data represent mean±SD for n=5-8/group, p-  
 159 value for main effect of group determined by one-way ANOVA, \*\*\*\* p<0.0001 denotes  
 160 significant difference between groups determined by post hoc Tukey's multiple comparisons  
 161 test).

162 Aside from providing information on changes in bone structural parameters over time, *in vivo*  
163 micro-CT also provided the possibility to assess dynamic bone formation and resorption  
164 activities such as bone formation/resorption rate (BFR/BRR), mineral apposition/resorption  
165 rate (MAR/MRR) and mineralizing/eroded surface (MS/ES) [18]. The net remodeling rate  
166 (BFR-BRR), which gives an indication whether there was overall bone gain (i.e., BFR-BRR>0)  
167 or loss (i.e., BFR-BRR<0) occurring within the trabecular compartment, tended to develop  
168 differently between groups (p=0.056). Compared to the static and sham-loaded groups, which  
169 had an overall negative remodeling balance, the 2Hz, 5Hz and 10Hz had an overall positive  
170 remodeling balance (p≤0.01, p≤0.001 and p<0.0001, Fig 2A). The net remodeling rate did not  
171 significantly change over time. When bone formation and resorption rates were analyzed  
172 separately, the main differences in the cyclic loading groups were in the reduced BRR as  
173 compared to the sham and static groups. While BFR did not significantly differ between groups  
174 (p>0.05, Fig 2B), BRR was 35% (p<0.01), 50% (p<0.0001) and 44% (p<0.0001) lower in the  
175 2Hz, 5Hz, 10Hz groups, respectively, compared to the sham-loaded group (Fig 2C). The static  
176 group on the other hand had a similar BRR (-2%, p>0.05) as the sham-loaded group (Fig 2C).

177 A difference between the cyclic and static loading groups was also apparent when investigating  
178 the surfaces of formation (mineralized surface, MS, interaction effect p<0.05) and resorption  
179 (eroded surface, ES, interaction effect p≥0.05) sites with the cyclic loading groups having a  
180 higher MS and lower ES compared to the static and sham-loaded groups (Fig 2D). On average,  
181 formation sites occupied 2, 2.5 and 2.6 more surfaces than resorption sites for the 2Hz, 5Hz and  
182 10Hz groups, and only 1.4 times more for the control and static groups, respectively.

183

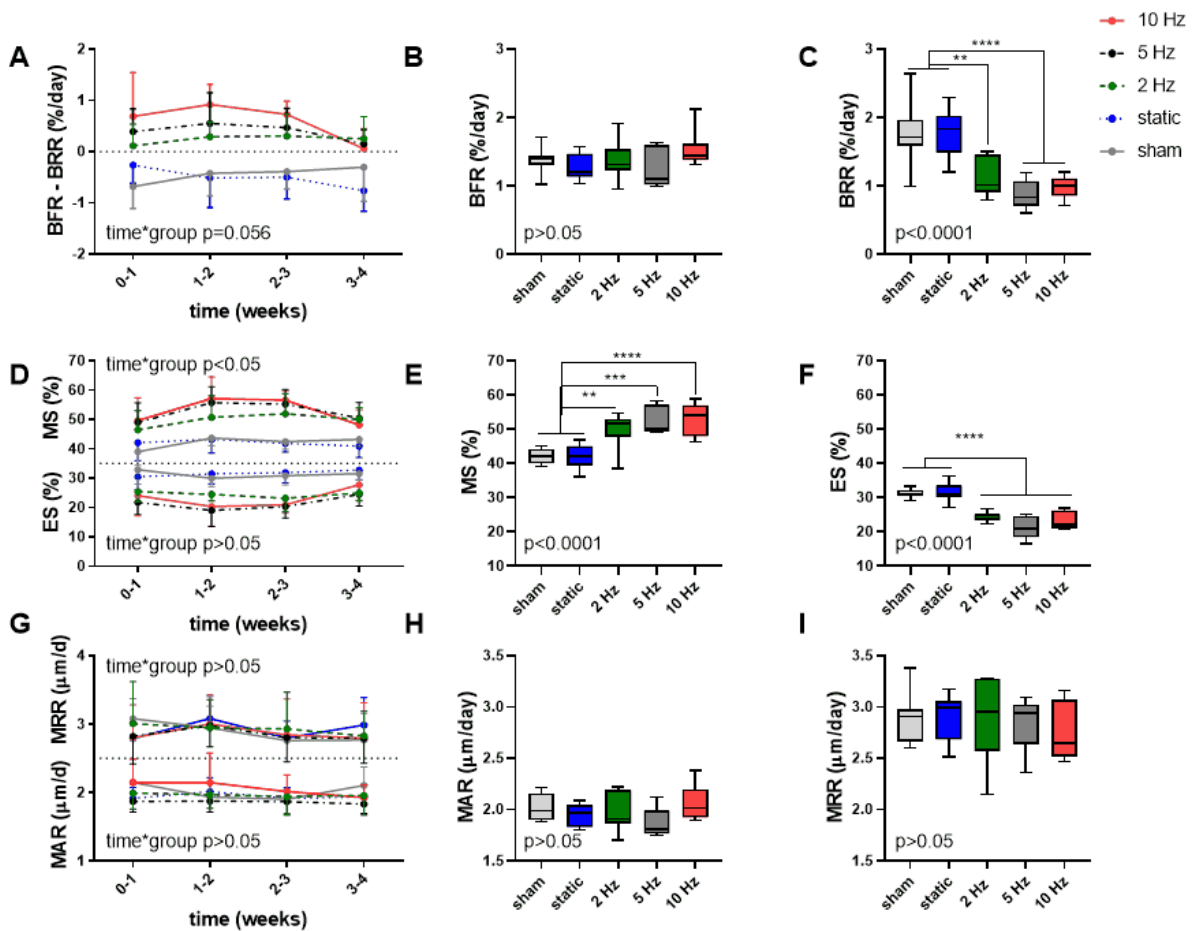

184

185 **Fig 2. Dynamic bone morphometric parameters in the trabecular compartment in the**  
 186 **different loading groups as assessed by *in vivo* micro-CT.** (A) Changes in the net remodeling  
 187 rate shown as the difference between bone formation rate (BFR) and bone resorption rate (BRR)  
 188 over the 4-week loading period. Overall difference between groups of (B) BFR and (C) BRR.  
 189 (D) Mineralized surface (MS) and eroded surface (ES) over the 4-week loading period. Overall  
 190 difference between groups of (E) MS and (F) ES. (G) Mineral apposition rate (MAR) and  
 191 mineral resorption rate (MRR) over the 4-week loading period. Overall difference between  
 192 groups of (H) MAR and (I) MRR. (Data represent mean±SD for n=5-8/group, p-values for  
 193 interaction effect between group and time are shown as determined by linear mixed effects  
 194 model (A,D,G), boxplots showing the differences between groups as determined by Tukey's  
 195 post hoc multiple comparisons test \* p<0.05, \*\* p<0.01, \*\*\* p<0.001, \*\*\*\* p<0.0001  
 196 (B,C,E,F,H,I))

197 Furthermore, the 2Hz, 5Hz and 10Hz groups had a 18% (p=0.0078), 25% (p=0.0007) and 26%  
 198 (p>0.0001) higher mineralized surface (MS) and a 22% (p<0.0001), 32% (p<0.0001) and 26%  
 199 (p<0.0001) lower eroded surface (ES) compared to the sham-loaded group, while the static

200 group had similar MS and ES compared to sham-loading ( $p>0.05$ , Fig 2E-F). The mineral  
201 apposition and resorption rates (MAR and MRR), which represent the thicknesses of formation  
202 and resorption packages, respectively, did not develop differently between groups (interaction  
203 effects  $p=0.586$  and  $p=0.459$ ). Furthermore, the MAR and MRR were similar between groups  
204 ( $p>0.05$ ), thus suggesting that they are not affected by loading (Fig 2G-I). This indicates that  
205 cyclic loading had a greater effect on surface than on thickness of formation as well as  
206 resorption sites.

### 207 **Bone adaptation to load is controlled by mechanical signals in the local *in vivo*** 208 **environment**

209 In order to assess whether bone remodeling events - namely formation, quiescence (i.e., where  
210 no remodeling occurred) and resorption - can be linked to the corresponding mechanical signals  
211 in the local *in vivo* environment, we performed micro-finite element (micro-FE) analysis to  
212 calculate the strain distribution within the tissue. As deformation (direct cell strain) and  
213 interstitial fluid flow (shear stress) are hypothesized to be the main mechanical stimuli that  
214 regulate load-induced bone adaptation [27], we quantified the strain energy density (SED)  
215 magnitudes as a measure of mechanical deformation and the spatial gradient thereof ( $\nabla$ SED),  
216 as a measure of fluid flow, respectively [16, 28]. Figure 3 displays a representative visualization  
217 of a section of the vertebrae of the 10Hz group showing sites of bone remodeling (Fig 3A) as  
218 well as the corresponding maps of SED (Fig 3B) and  $\nabla$ SED (Fig 3C). From this qualitative  
219 analysis, it is apparent that bone resorption occurs at sites of lower SED and  $\nabla$ SED, respectively,  
220 whereas bone formation occurs at sites of higher SED and  $\nabla$ SED (Fig 3).

221

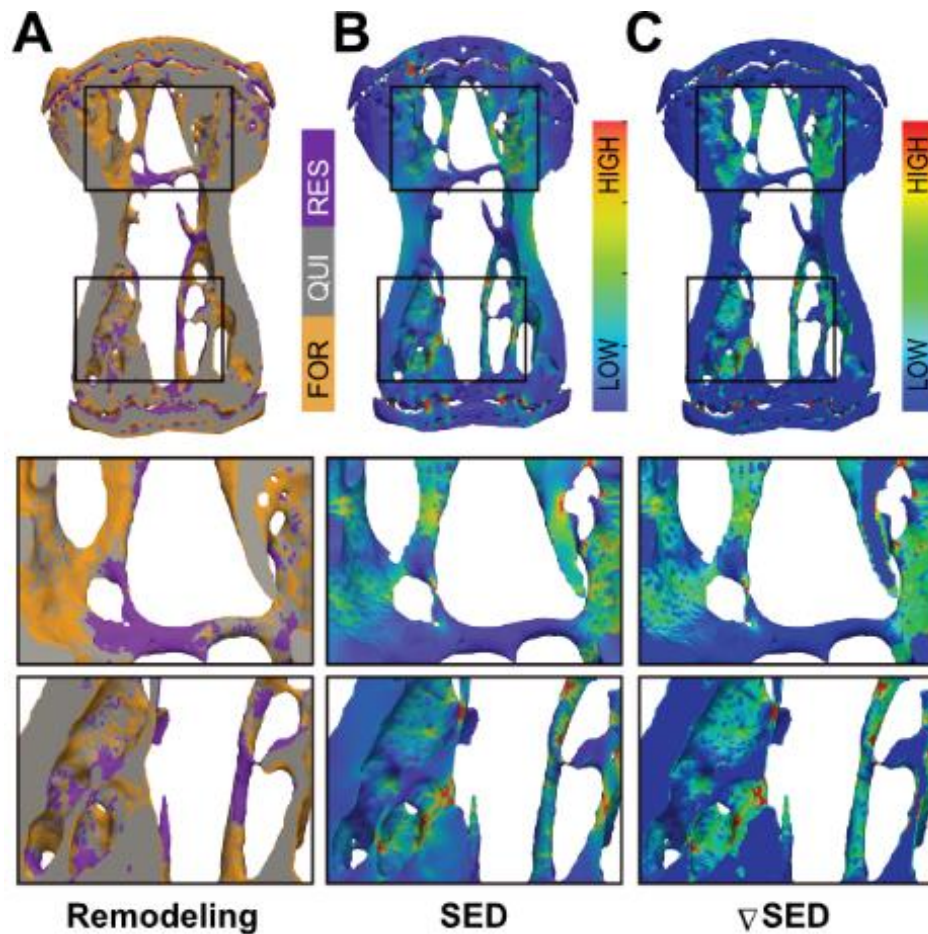

222

223 **Fig 3. Qualitative visualization linking bone remodeling sites (formation, quiescence,**  
224 **resorption) with the mechanical environments *in vivo*.** (A) Overlay of time-lapsed micro-CT  
225 images showing sites of bone formation (orange), quiescence (grey) and resorption (purple).  
226 Corresponding map of the (B) strain energy density (SED) and (C) gradient thereof ( $\nabla$ SED)  
227 showing sites of higher (red) and lower (blue) SED/ $\nabla$ SED values obtained by micro-finite  
228 element (micro-FE) analysis.

229 To establish a quantitative description of the mechano-regulation of bone remodeling, we  
230 calculated the conditional probabilities for a given remodeling event to occur as a function of  
231 the mechanical stimuli, also known as remodeling rules [15]. Figure 4 shows the conditional  
232 probability curves for formation (orange), quiescence (grey) or resorption (purple) to occur at  
233 a given value of SED (Fig 4A,C,E) or  $\nabla$ SED (Fig 4B,D,F) for the different groups averaged  
234 over all time points. For all groups, the conditional probability for bone formation to occur was  
235 higher at higher values of SED and  $\nabla$ SED, respectively ( $SED/SED_{max} > 0.18$ ) whereas bone

236 resorption was more likely to occur at lower values ( $SED/SED_{max} < 0.18$ ). The probability  
237 curves for all groups were fit by exponential functions (Table S1), of which the coefficients  
238 provide information on the functioning of the mechanosensory system as described previously  
239 [15]. When comparing the slopes of the formation probability curves (parameter  $a$ , Fig 4A,B  
240 and Table S1), which can be interpreted as the mechanical sensitivity of the system, there was  
241 a gradual increase of the mechanical sensitivity with increasing frequency with the 10Hz group  
242 showing the highest mechanical sensitivity ( $a_{SED} = 0.217$ ,  $a_{SEDgrad} = 0.316$ ). For the resorption  
243 probability curves (Fig 4E,F and Table S1), the 5Hz and 10Hz groups showed similar  
244 mechanical sensitivity to SED ( $a_{SED} = 0.284$ ), while the 5Hz group showed highest sensitivity  
245 to  $\nabla SED$  ( $a_{SEDgrad} = 0.264$  compared to  $a_{SEDgrad} = 0.252$  in 10Hz group). The probability of the  
246 quiescence however, was not influenced by loading frequency (Fig 4C,D). When comparing  
247 between SED and  $\nabla SED$  as mechanical stimuli driving bone remodeling events, it seems that in  
248 all groups, formation was more sensitive to  $\nabla SED$  shown by the higher slopes ( $a_{SED} < a_{gradSED}$ )  
249 of the probability curves (Fig 4A,B and Table S1). In contrast, resorption seemed to be more  
250 sensitive to SED ( $a_{SED} > a_{gradSED}$ , Fig 4 E,F and Table S1).

251



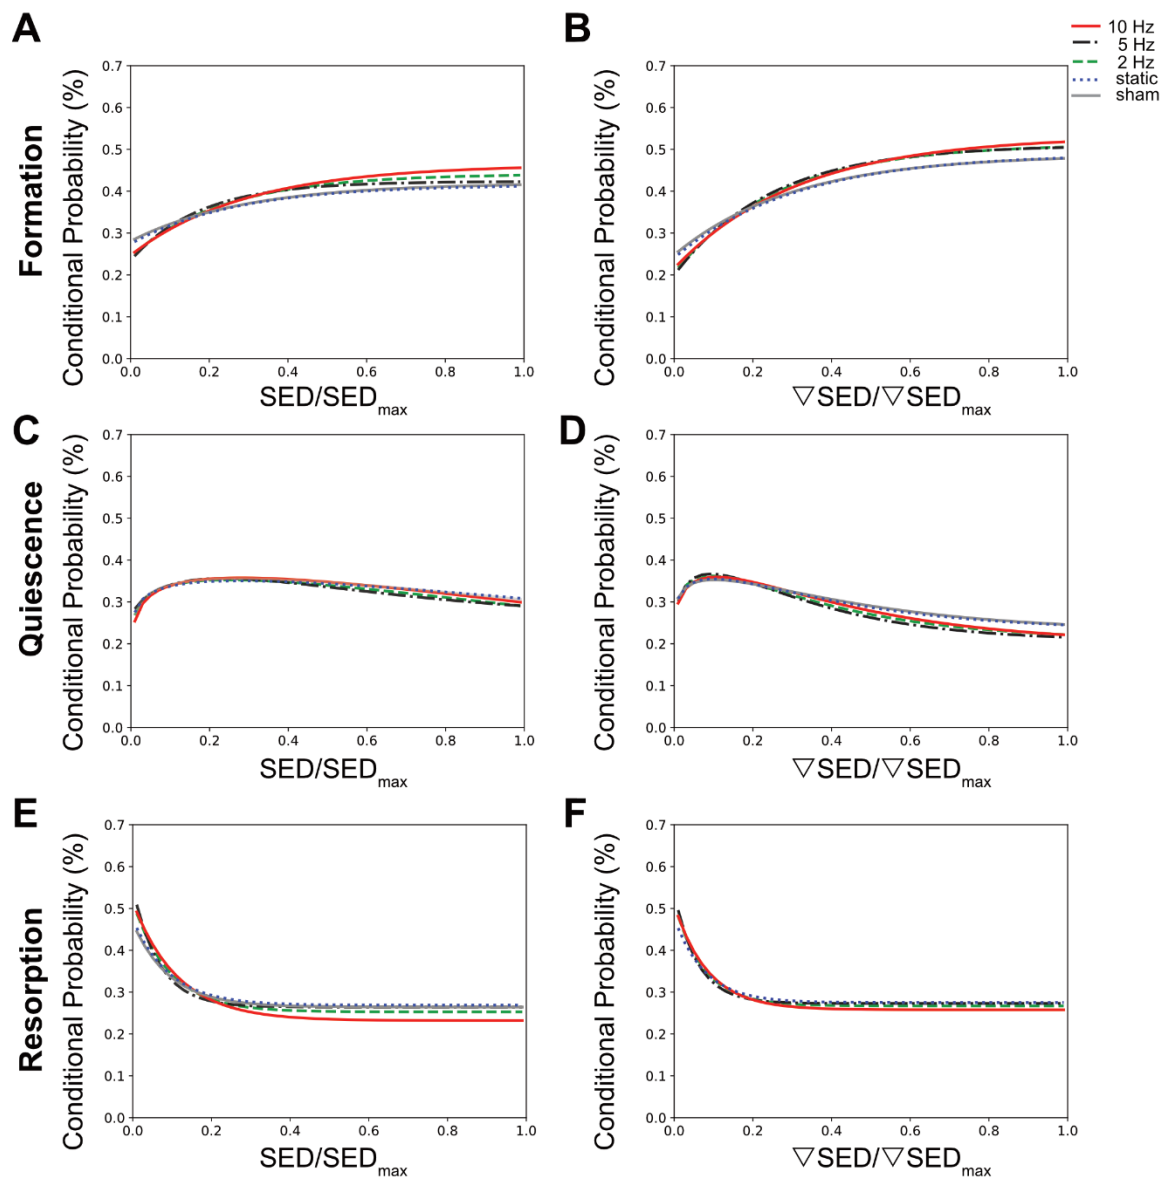

252

253 **Fig 4. Conditional probabilities connecting SED (left side) and SED gradient ( $\nabla SED$ , right**  
254 **side) with remodeling events.** The plots show the exponential fitting functions for (A,B) bone  
255 formation (top row), (C,D) quiescence (middle row) and (E,F) resorption (bottom row) in all  
256 the loading groups averaged over all time points.

257 To better compare the modeling performance of SED versus  $\nabla SED$  for the prediction of bone  
258 remodeling events, an area under the receiver operator characteristic curve (AUC) approach  
259 was used (Fig 5). For all groups, the AUC values for formation (for all groups  $p < 0.0001$ , Fig  
260 5A) and resorption (for all groups  $p < 0.05$  except for 5Hz  $p < 0.10$ , Fig 6C) events were higher



261 for the  $\nabla$ SED compared to SED. No difference between SED and  $\nabla$ SED was observed for  
262 quiescence (Fig 5B). These results suggest that  $\nabla$ SED has a better modeling performance  
263 compared to SED for determining the probability of bone formation and resorption events.

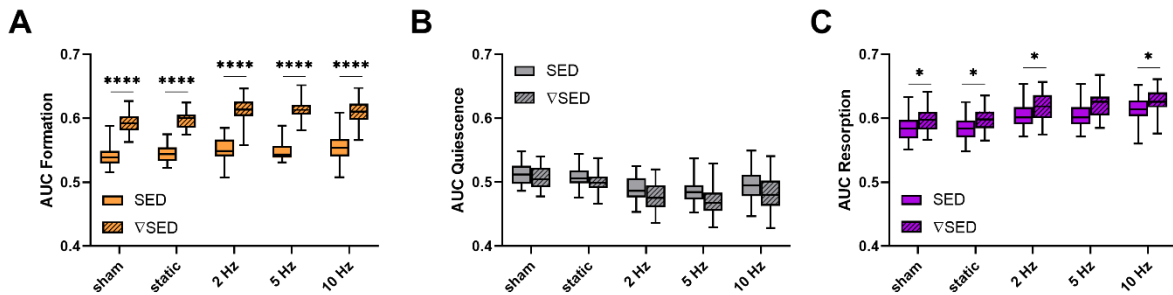

264

265 **Fig 5. Area under the curve (AUC) values for the comparison of the modeling**  
266 **performance of SED and SED gradient.** (A) Formation (orange), (B) quiescence (grey) and  
267 (C) resorption (violet) sites for the different loading groups comparing modeling performance  
268 of SED (solid bars) and SED gradient ( $\nabla$ SED, striped bars). (Boxplots for n=5-8/group, \*  
269 p<0.05, \*\*\*\* p<0.0001 differences between groups determined by Tukey's multiple  
270 comparisons test).

## 271 Discussion

272 In this study, the effects of cyclic loading at varying frequencies as well as of static loading on  
273 trabecular bone adaptation in mouse caudal vertebrae were investigated. Furthermore, using a  
274 combination of *in vivo* micro-CT and micro-FE analysis, we assessed whether local bone  
275 remodeling events (formation and resorption) can be linked to diverse mechanical environments  
276 *in vivo*.

277 While static loading had catabolic effects, cyclic loading at 2Hz, 5Hz and 10Hz had anabolic  
278 effects on trabecular bone. In line with previous studies using the tail loading model [17, 26],  
279 cyclic loading over four weeks led to an increase in BV/TV, which was driven by the thickening  
280 of individual trabeculae rather than a prevention of loss in trabecular number. Furthermore, by  
281 registering consecutive time-lapsed images onto one-another, we were able to quantify both

282 bone formation as well as bone resorption activities in three dimensions [26], which to the best  
283 of our knowledge, has not yet been used to assess the effects of static loading regimes.  
284 Specifically, we showed that cyclic loading mainly affects the surfaces of the bone formation  
285 and resorption sites (MS and ES), rather than the thickness of these remodeling packets (MAR  
286 and MRR). In agreement with previous studies [18, 26], these results suggest that cyclic loading  
287 promotes osteoblast recruitment, while simultaneously inhibiting osteoclast recruitment.  
288 Ultimately, cyclic loading results in larger mineralized surfaces and smaller eroded surfaces  
289 while keeping the thickness of the remodeling packets constant.

290 Notably, this study showed a logarithmic relationship between loading frequency and load-  
291 induced bone adaptation with frequencies above a certain threshold having anabolic effects and  
292 those below having catabolic effects. That cyclic, but not static loading, has anabolic effects on  
293 cortical bone has been shown in various animal models including rabbits [2], turkeys [1] and  
294 rats [3, 4]. However, to the best of our knowledge, the effect of static loading has not yet been  
295 assessed in trabecular bone in mice. In line with the existence of a frequency threshold  
296 ( $0.36\text{Hz}\pm 0.08$ ) to elicit anabolic responses as demonstrated in this study, Turner et al. found  
297 that bone formation rate in rat tibiae only increased with frequencies above 0.5Hz, followed by  
298 a dose-response increase up to 2Hz [5]. Using a similar design as our study, Warden et al.  
299 showed increased cortical bone adaptation with increasing loading frequencies up to 5 to 10Hz  
300 with no additional benefits beyond 10Hz [10]. In a theoretical study, Kameo et al. furthermore  
301 showed similar results by subjecting individual trabeculae to uniaxial loading at frequencies  
302 ranging from 1 to 20Hz [12]. Although one would expect higher loading frequencies to lead to  
303 higher cellular stimulation and a consequent greater anabolic response, it has been suggested  
304 that frequencies above a certain threshold (10Hz) reduce the efficiency of fluid flow through  
305 the LCN, thus resulting in inefficient mechanotransduction [10, 29]. More recently, by

306 monitoring  $\text{Ca}^{2+}$  signaling in living animals, Lewis et al. have shown that osteocyte recruitment  
307 was strongly influenced by loading frequency [30]. Another physiological system, for which  
308 the relationship between frequency and mechanotransduction is widely studied, is the inner ear  
309 [31, 32]. Hair cells, the cells responsible for transducing mechanical forces originating from  
310 acoustic waves to neural signals, are sensitive to frequency [31, 33]. Furthermore, the sensitivity  
311 of the ear varies with the frequency of sound waves resulting in a limited range of frequencies  
312 that can be perceived. Hence, drawing an analogy to the theory of sound pressure level, which  
313 also displays logarithmic laws [34], it is possible that bone's response to frequency is similar  
314 to the perception of sound in human hearing.

315 One limitation of this study was that loading at low (1Hz) and higher (>10Hz) frequencies was  
316 not assessed. Furthermore, as the strain magnitude and duration of individual loading bouts  
317 were the same for all loading groups, the number of cycles and strain rate differed between the  
318 different loading groups. From this study design, it therefore remains impossible to know  
319 whether the number of cycles or the loading frequency are the main factors driving load-induced  
320 bone adaptation. Hence, whether bone's osteogenic response to loading is indeed limited to a  
321 specific range of frequencies, below and above which bone becomes less osteogenic, requires  
322 further *in vivo* experiments.

323 Using the combined approach of time-lapsed *in vivo* micro-CT imaging and micro-FE analysis,  
324 we showed that bone remodeling activities were correlated to the local mechanical environment  
325 at the tissue level. In agreement with previous studies [15, 17], bone formation was more likely  
326 to occur at sites of higher SED whereas bone resorption was more likely to occur at sites of  
327 lower SED. Furthermore, compared to static loading, cyclic loading decreased the probability  
328 of non-targeted bone remodeling, which led to an increase in bone formation and a decrease in  
329 bone resorption. In addition, we showed that the SED gradient was better at predicting bone

330 formation and resorption events compared to SED. That the SED gradient, a measure of fluid  
331 flow through the LCN, can improve predictions of remodeling events compared to SED, a  
332 measure of direct cell strain, has been suggested previously [16]. Furthermore, as the SED  
333 gradient encompasses the neighboring SED voxels, it provides information of a broader  
334 mechanical environment, which could explain the higher modeling performance observed with  
335 the SED gradient compared to SED. An additional limitation of this study was that the micro-  
336 FE analysis did not take into account the component of frequency. Although our approach  
337 enabled us to link bone remodeling events to mechanical environments *in vivo* at the local level,  
338 the addition of theoretical models that incorporate cellular mechanosensing and intercellular  
339 communication [12, 35-37] will be highly useful to improve our understanding of the  
340 relationship between loading frequency and bone adaptation across multiple scales.

341 In conclusion, these results suggest that bone adaptation is regulated by mechanical signals in  
342 the local *in vivo* environment and furthermore, that mechano-regulation is logarithmically  
343 dependent on loading frequency with frequencies below a certain threshold having catabolic  
344 effects, and those above anabolic effects. This study thereby provides valuable insights towards  
345 a better understanding of the mechanical signals influencing bone formation and resorption in  
346 the local *in vivo* environment.

347

## 348 **Materials and Methods**

### 349 **Study Design**

350 To investigate the effect of loading frequency on mouse caudal vertebrae, 11-week old female  
351 C57BL/6J mice were purchased (Charles River Laboratories, France) and housed at the ETH  
352 Phenomics Center (12h:12h light-dark cycle, maintenance feed and water ad libitum, three to  
353 five animals/cage) for one week. To enable mechanical loading of the 6<sup>th</sup> caudal vertebrae  
354 (CV6), stainless steel pins (Fine Science Tools, Heidelberg, Germany) were inserted into the  
355 fifth and seventh caudal vertebrae of all mice at 12 weeks of age. After three weeks of recovery,  
356 the mice received either sham (0N), 8N static or 8N cyclic loading with frequencies of 2Hz,  
357 5Hz, or 10Hz and were scanned weekly using *in vivo* micro-CT. All procedures were performed  
358 under isoflurane anaesthesia (induction/maintenance: 5%/1-2% isoflurane/oxygen). All mouse  
359 experiments described in the present study were carried out in strict accordance with the  
360 recommendations and regulations in the Animal Welfare Ordinance (TSchV 455.1) of the Swiss  
361 Federal Food Safety and Veterinary Office (license number 262/2016).

### 362 **Mechanical loading**

363 The loading regime was performed for five minutes, three times per week over 4 weeks as  
364 described previously [14]. For the cyclic loading groups, sinusoidally varying forces (8N  
365 amplitude) were applied at 2Hz, 5Hz or 10Hz resulting in cycle numbers of 600, 1500 and 3000,  
366 respectively. For the static loading group, the force was maintained at 8N during the five  
367 minutes. For the sham-loaded group, the tails were fixed in the loading device for five minutes,  
368 but no loading was applied (0N).

### 369 **Micro-CT imaging and analysis**

370 *In vivo* micro-CT (vivaCT 40, Scanco Medical AG, isotropic nominal resolution: 10.5  $\mu$ m; 55  
371 kVp, 145  $\mu$ A, 350 ms integration time, 500 projections per 180°, scan duration ca. 15 min,

372 radiation dose per scan ca. 640 mGy) images of the CV6 were acquired every week. Micro-CT  
373 data was processed and standard bone microstructural parameters were calculated in trabecular,  
374 cortical and whole bone by using automatically selected masks for these regions as described  
375 previously [26]. To calculate dynamic morphometric parameters, micro-CT images from  
376 consecutive time-points were registered onto one another. The voxels present only at the initial  
377 time point were considered resorbed whereas voxels present only at the later time point were  
378 considered formed. Voxels that were present at both time points were considered as quiescent  
379 bone. By overlaying the images, morphometrical analysis of bone formation and resorption  
380 sites within the trabecular region allowed calculations of bone formation rate (BFR), bone  
381 resorption rate (BRR), mineral apposition rate (MAR), mineral resorption rate (MRR),  
382 mineralizing surface (MS) and eroded surface (ES) [18].

### 383 **Micro-finite element (micro-FE) analysis**

384 For each mouse at each time point, segmented image data was converted to 3D micro-FE  
385 models, with additional voxels added to the proximal and distal ends of the vertebrae mimicking  
386 intervertebral discs. All voxels were converted to 8 node hexahedral elements and assigned a  
387 Young's modulus of 14.8 GPa and a Poisson's ratio of 0.3 [14]. The bone was assumed to have  
388 linear elastic behaviour, which allowed for static loading in the micro-FE analysis [38]. The top  
389 was displaced by 1% of the length in z-direction (longitudinal axis), while the bottom was  
390 constrained in all directions. The micro-FE model was solved using a micro-FE solver  
391 (ParOSol). The results were then rescaled to an applied force of 8N for the loaded groups and  
392 4N (physiological loading) for the sham-loaded group (0N) as described previously [39].

### 393 **Mechanical environment**

394 The mechanical stimuli, which are hypothesized to drive load induced bone adaptation are  
395 deformation (direct cell strain) and interstitial fluid flow (shear stress) [27]. As a measure of

396 the mechanical deformation, strain energy density (SED) magnitudes, defined as the increase  
397 in energy associated with the tissue deformation per unit volume, were analysed on the bone  
398 surface on the marrow-bone interface. Furthermore, based on the assumption that spatial  
399 differences in tissue deformation induce fluid flow, the spatial gradient of the SED was  
400 analyzed on the marrow side of the marrow-bone interface [28]. The spatial gradients in x, y  
401 and z-direction were calculated as follows:

$$402 \quad \frac{\partial f_i}{\partial x,y,z} = \frac{f_{i+1} - f_{i-1}}{2a} \quad \text{for voxel } 1 < i < N_x$$

403 Where  $f_i$  is the SED of a voxel at x, y, z-position  $i$ ,  $N_{x,y,z}$  the number of voxels in the x,y,z-  
404 direction and  $a$  the nominal resolution. The norm of the gradient vector ( $\nabla$ SED) was used as a  
405 quantity for the fluid flow as described previously [16].

$$406 \quad \nabla \text{SED} = \sqrt{\left(\frac{\partial f_i}{\partial x}\right)^2 + \left(\frac{\partial f_i}{\partial y}\right)^2 + \left(\frac{\partial f_i}{\partial z}\right)^2}$$

407 The conditional probabilities for a certain remodeling event (formation, quiescence, resorption)  
408 to occur at a given value of SED and  $\nabla$ SED were calculated as described previously [15].  
409 Briefly, the surface SED and  $\nabla$ SED values were normalized within each animal and  
410 measurement by the maximal SED or  $\nabla$ SED, respectively (chosen as the 99<sup>th</sup> percentile of the  
411 values present at the surface and in the volume of interest (VOI) in order to remove the variance  
412 due to temporal bone adaptation, applied force in FE analysis and individual animals. For each  
413 region (formation, quiescence and resorption), a frequency density histogram with 50 bins and  
414 equal bin width was created. In order to rule out the dependence on the imbalance between bone  
415 formation and resorption, all remodeling events were assumed to have the same occurrence  
416 probability (i.e., formation, resorption and quiescent regions were rescaled to have the same

417 amount of voxels). The remodeling probabilities were fitted by exponential functions using  
418 non-linear regression analysis.

419 To quantify the modeling performance of SED and  $\nabla$ SED, respectively, the area under the curve  
420 (AUC) of a receiver operating characteristic (ROC) curve was used. The AUC can be defined  
421 as the probability that a randomly selected case (“true”) will have a higher test result than a  
422 randomly selected control (“false”) [40]. The ROC curve is a binary classifier, therefore the  
423 three different surface regions were analysed separately and only voxels and mechanical  
424 quantity values on the bone or marrow surface were used for the classification.

#### 425 **Statistical analysis**

426 Data are represented as mean $\pm$ SD. For analysis of the longitudinal measurements of bone  
427 structural parameters, repeated measurements ANOVA implemented as a linear mixed model  
428 was used using the lmerTEST package [41] in R (R Core Team (2019), R Foundation for  
429 Statistical Computing, Vienna, Austria). The between subjects effect was allocated to the  
430 different groups (sham, static, 2Hz, 5Hz, 10Hz) while the within-subjects effects were allocated  
431 to time and time-group interactions. Random effects were allocated to the animal to account for  
432 the natural differences in bone morphometry in different mice. In cases where a significant  
433 interaction effect (group\*time) was found, a Tukey post-hoc multiple comparisons test was  
434 performed. For comparisons between groups one-way ANOVA analysis followed by Tukey’s  
435 or Dunnet’s multiple comparisons test were performed as stated in the corresponding figure  
436 legends using SPSS (IBM Corp. Released 2016. IBM SPSS Statistics for Windows, Version  
437 24.0. Armonk, NY, USA). The plots were created using GraphPad Software (GraphPad Prism  
438 version 8.2.0 for Windows, GraphPad Software, La Jolla California, USA). Significance was  
439 set at  $\alpha < 0.05$  in all experiments.



## 440 **Acknowledgments**

441 This manuscript is based upon work supported by the European Cooperation in Science and  
442 Technology (COST Action BM1402: MouseAGE), the European Research Council (ERC  
443 Advanced MechAGE ERC-2016-ADG-741883) and the Kyoto University Global Frontier  
444 Project for Young Professionals: the John Mung Program.

## 445 **References**

- 446 1. Lanyon LE, Rubin CT. Static Vs dynamic loads as an influence on bone remodeling. *J*  
447 *Biomech.* 1984;17(12):897-905.
- 448 2. Hert J, Liskova M, Landa J. Reaction of bone to mechanical stimuli. 1. Continuous and  
449 intermittent loading of tibia in rabbit. *Folia Morphol (Praha).* 1971;19(3):290-300.
- 450 3. Turner CH, Owan I, Takano Y. Mechanotransduction in bone: role of strain rate. *Am J*  
451 *Physiol.* 1995;269(3 Pt 1):E438-42.
- 452 4. Robling AG, Duijvelaar KM, Geevers JV, Ohashi N, Turner CH. Modulation of  
453 appositional and longitudinal bone growth in the rat ulna by applied static and dynamic  
454 force. *Bone.* 2001;29(2):105-13.
- 455 5. Turner CH, Forwood MR, Otter MW. Mechanotransduction in bone - do bone-cells act  
456 as sensors of fluid-flow. *Faseb Journal.* 1994;8(11):875-8.
- 457 6. Rubin CT, Mcleod KJ. Promotion of bony ingrowth by frequency-specific, low-  
458 amplitude mechanical strain. *Clin Orthop Relat Res.* 1994(298):165-74.
- 459 7. Hsieh Y-F, Turner CH. Effects of loading frequency on mechanically induced bone  
460 formation. *J Bone Miner Res.* 2001;16(5):918-24.
- 461 8. Turner CH. Three rules for bone adaptation to mechanical stimuli. *Bone.*  
462 1998;23(5):399-407.
- 463 9. You L, Cowin SC, Schaffler MB, Weinbaum S. A model for strain amplification in the  
464 actin cytoskeleton of osteocytes due to fluid drag on pericellular matrix. *J Biomech.*  
465 2001;34(11):1375-86.
- 466 10. Warden SJ, Turner CH. Mechanotransduction in cortical bone is most efficient at  
467 loading frequencies of 5-10 Hz. *Bone.* 2004;34(2):261-70.
- 468 11. Tiwari AK, Kumar N. Establishing the relationship between loading parameters and  
469 bone adaptation. *Med Eng Phys.* 2018;56:16-26.
- 470 12. Kameo Y, Adachi T, Hojo M. Effects of loading frequency on the functional adaptation  
471 of trabeculae predicted by bone remodeling simulation. *J Mech Behav Biomed Mater.*  
472 2011;4(6):900-8.
- 473 13. Zhang P, Tanaka SM, Sun Q, Turner CH, Yokota H. Frequency-dependent enhancement  
474 of bone formation in murine tibiae and femora with knee loading. *J Bone Miner Metab.*  
475 2007;25(6):383-91.

- 476 14. Webster DJ, Morley PL, van Lenthe GH, Muller R. A novel in vivo mouse model for  
477 mechanically stimulated bone adaptation - a combined experimental and computational  
478 validation study. *Comput Methods Biomech Biomed Engin.* 2008;11(5):435-41.
- 479 15. Schulte FA, Ruffoni D, Lambers FM, Christen D, Webster DJ, Kuhn G, et al. Local  
480 mechanical stimuli regulate bone formation and resorption in mice at the tissue level.  
481 *PloS One.* 2013;8(4):e62172.
- 482 16. Webster DJ, Schulte FA, Lambers FM, Kuhn G, Müller R. Strain energy density  
483 gradients in bone marrow predict osteoblast and osteoclast activity: a finite element  
484 study. *J Biomech.* 2015;48(5):866-74.
- 485 17. Lambers FM, Kuhn G, Weigt C, Koch KM, Schulte FA, Müller R. Bone adaptation to  
486 cyclic loading in murine caudal vertebrae is maintained with age and directly correlated  
487 to the local micromechanical environment. *J Biomech.* 2015;48(6):1179-87.
- 488 18. Schulte FA, Lambers FM, Kuhn G, Müller R. In vivo micro-computed tomography  
489 allows direct three-dimensional quantification of both bone formation and bone  
490 resorption parameters using time-lapsed imaging. *Bone.* 2011;48(3):433-42.
- 491 19. Huiskes R, Ruimerman R, van Lenthe GH, Janssen JD. Effects of mechanical forces on  
492 maintenance and adaptation of form in trabecular bone. *Nature.* 2000;405(6787):704-6.
- 493 20. Birkhold AI, Razi H, Duda GN, Checa S, Willie BM. Tomography-Based  
494 Quantification of Regional Differences in Cortical Bone Surface Remodeling and  
495 Mechano-Response. *Calcif Tissue Int.* 2017;100(3):255-70.
- 496 21. Cheong VS, Campos Marin A, Lacroix D, Dall'Ara E. A novel algorithm to predict  
497 bone changes in the mouse tibia properties under physiological conditions. *Biomech  
498 Model Mechanobiol.* 2020;19(3):985-1001.
- 499 22. Fritton SP, Weinbaum S. Fluid and solute transport in bone: flow-induced  
500 mechanotransduction. *Annu Rev Fluid Mech.* 2008;41(1):347-74.
- 501 23. Klein-Nulend J, Bakker AD, Bacabac RG, Vatsa A, Weinbaum S. Mechanosensation  
502 and transduction in osteocytes. *Bone.* 2013;54(2):182-90.
- 503 24. Weinbaum S, Duan Y, Thi MM, You LD. An integrative review of  
504 mechanotransduction in endothelial, epithelial (renal) and dendritic cells (osteocytes).  
505 *Cell Mol Bioeng.* 2011;4(4):510-37.
- 506 25. Tiwari AK, Kumar R, Tripathi D, Badhyal S. In silico modeling of bone adaptation to  
507 rest-inserted loading: Strain energy density versus fluid flow as stimulus. *Journal of  
508 Theoretical Biology.* 2018;446:110-27.
- 509 26. Lambers FM, Schulte FA, Kuhn G, Webster DJ, Müller R. Mouse tail vertebrae adapt  
510 to cyclic mechanical loading by increasing bone formation rate and decreasing bone  
511 resorption rate as shown by time-lapsed in vivo imaging of dynamic bone morphometry.  
512 *Bone.* 2011;49(6):1340-50.
- 513 27. Rosa N, Simoes R, Magalhaes FD, Marques AT. From mechanical stimulus to bone  
514 formation: A review. *Med Eng Phys.* 2015;37(8):719-28.
- 515 28. Kufahl RH, Saha S. A theoretical model for stress-generated fluid flow in the canaliculi-  
516 lacunae network in bone tissue. *J Biomech.* 1990;23(2):171-80.

- 517 29. Kameo Y, Adachi T, Hojo M. Transient response of fluid pressure in a poroelastic  
518 material under uniaxial cyclic loading. *J Mech Phys Solids*. 2008;56(5):1794-805.
- 519 30. Lewis KJ, Frikha-Benayed D, Louie J, Stephen S, Spray DC, Thi MM, et al. Osteocyte  
520 calcium signals encode strain magnitude and loading frequency in vivo. *Proc Natl Acad  
521 Sci USA*. 2017;114(44):11775.
- 522 31. Jaalouk DE, Lammerding J. Mechanotransduction gone awry. *Nat Rev Mol Cell Bio*.  
523 2009;10(1):63-73.
- 524 32. Vollrath MA, Kwan KY, Corey DP. The micromachinery of mechanotransduction in  
525 hair cells. *Annu Rev Neurosci*. 2007;30(1):339-65.
- 526 33. Salvi JD, Ó Maoiléidigh D, Fabella BA, Tobin M, Hudspeth AJ. Control of a hair  
527 bundle's mechanosensory function by its mechanical load. *Proc Natl Acad Sci USA*.  
528 2015;112(9):E1000.
- 529 34. Beranek LL, Mellow TJ. Chapter 1 - Introduction and terminology. In: Beranek LL,  
530 Mellow TJ, editors. *Acoustics: Sound Fields and Transducers*: Academic Press; 2012.  
531 p. 1-19.
- 532 35. Chennimalai Kumar N, Dantzig JA, Jasiuk IM. Modeling of cortical bone adaptation in  
533 a rat ulna: Effect of frequency. *Bone*. 2012;50(3):792-7.
- 534 36. Malachanne E, Dureisseix D, Jourdan F. Numerical model of bone remodeling sensitive  
535 to loading frequency through a poroelastic behavior and internal fluid movements. *J  
536 Mech Behav Biomed Mater*. 2011;4(6):849-57.
- 537 37. Pereira AF, Javaheri B, Pitsillides AA, Shefelbine SJ. Predicting cortical bone  
538 adaptation to axial loading in the mouse tibia. *J R Soc Interface*. 2015;12(110):0590.
- 539 38. Huiskes R. If bone is the answer, then what is the question? *Journal of Anatomy*.  
540 2000;197(2):145-56.
- 541 39. Christen P, van Rietbergen B, Lambers FM, Müller R, Ito K. Bone morphology allows  
542 estimation of loading history in a murine model of bone adaptation. *Biomech Model  
543 Mechanobiol*. 2012;11(3-4):483-92.
- 544 40. Mason SJ, Graham NE. Areas beneath the relative operating characteristics (ROC) and  
545 relative operating levels (ROL) curves: Statistical significance and interpretation. *Q J  
546 Roy Meteor Soc*. 2002;128(584):2145-66.
- 547 41. Kuznetsova A, Brockhoff PB, Christensen RHB. lmerTest Package: Tests in linear  
548 mixed effects models. *J Stat Softw*. 2017;82(13):1-26.

549

550

551 **Supplementary Information**

552 **S1 Table. Summary of non-linear regression functions and corresponding coefficients for**  
553 **the conditional probability (SED and SED gradient) in trabecular bone for the different**  
554 **groups averaged over all time points.**
